# Supplementary material for: Large ring polymers align FtsZ polymers for normal septum formation
Source: PubMed Central journal article supplement — EMBO J. 2011 Jan 11;30(3):617–26. doi: 10.1038/emboj.2010.345 (PMC3034016; doi:10.1038/emboj.2010.345), 2011-01-11

**Large ring polymers align FtsZ polymers for normal septum formation**

Muhammet E. Gündoğdu, Yoshikazu Kawai, Nada Pavlendova, Naotake Ogasawara, Jeff Errington, Dirk-Jan Scheffers, Leendert W. Hamoen

**Content:** Table S1: *B. subtilis* strains used in this study.  
Table S2: Primers used in this study.  
Fig. S1: Western blot of SepF and FtsZ titrations.  
Fig. S2: SDS-PAA of FtsZ pelleting assays, and SepF solubility test.  
Fig. S3: FtsZ light scattering under different buffer conditions.  
Fig. S4: Growing FtsZ-SepF tubules.  
Fig. S5: EM images of SepF mutants A98V and F124S with FtsZ.  
Fig. S6: Transmission EM of division septa in  $\DeltaftsA$  *B. subtilis* cells.

**Table S1:** *B. subtilis* strains used in this study.

| Name    | Relevant genotype                                                         | Reference               |
|---------|---------------------------------------------------------------------------|-------------------------|
| 168     | <i>trpC2</i>                                                              | Laboratory stock        |
| CRK6000 | <i>purA16 metB5 hisA3 guaB</i>                                            | (Moriya et al., 1990)   |
| MD133   | <i>trpC2 ftsA::cat aprE::P<sub>spac</sub>-ftsA kan</i>                    | (Ishikawa et al., 2006) |
| 4181    | <i>trpC2 amyE::P<sub>xyI</sub>-sepF-gfp spc</i>                           | (Hamoen et al., 2006)   |
| YK84    | CRK6000 <i>sepF::cat</i>                                                  | This work               |
| YK93    | CRK6000 <i>amyE::P<sub>xyI</sub>-sepF cat</i>                             | This work               |
| YK107   | CRK6000 <i>ftsA::erm amyE::P<sub>xyI</sub>-sepF cat</i>                   | This work               |
| YK146   | CRK6000 <i>amyE::P<sub>xyI</sub>-sepFA98V cat</i>                         | This work               |
| YK150   | CRK6000 <i>amyE::P<sub>xyI</sub>-sepFF124S cat</i>                        | This work               |
| YK179   | CRK6000 <i>ftsA::erm amyE::P<sub>xyI</sub>-sepFA98V cat</i>               | This work               |
| YK183   | CRK6000 <i>ftsA::erm amyE::P<sub>xyI</sub>-sepFF124S cat</i>              | This work               |
| YK204   | CRK6000 <i>sepF::spc</i>                                                  | (Ishikawa et al., 2006) |
| YK206   | CRK6000 <i>ftsA::erm</i>                                                  | (Ishikawa et al., 2006) |
| YK208   | CRK6000 <i>aprE::P<sub>ftsAZ</sub>-gfp-ftsZ spc</i>                       | (Ishikawa et al., 2006) |
| YK355   | CRK6000 <i>sepF::cat amyE::P<sub>xyI</sub>-sepFG135N-gfp spc</i>          | This work               |
| YK1040  | <i>trpC2 ftsA::erm</i>                                                    | (Ishikawa et al., 2006) |
| YK1042  | <i>trpC2 sepF::spc</i>                                                    | (Ishikawa et al., 2006) |
| YK1236  | <i>trpC2 ftsA::cat aprE::P<sub>spac</sub>-ftsA kan ΔsepF::pMutin4</i>     | This work               |
| YK1237  | <i>trpC2 ftsA::cat aprE::P<sub>spac</sub>-ftsA kan sepF::pMutin4</i>      | This work               |
| YK1238  | <i>trpC2 ftsA::cat aprE::P<sub>spac</sub>-ftsA kan sepFG135N::pMutin4</i> | This work               |

Hamoen, L.W., Meile, J.C., de Jong, W., Noirot, P. and Errington, J. (2006) SepF, a novel FtsZ-interacting protein required for a late step in cell division. *Mol Microbiol*, 59, 989-999.

Ishikawa, S., Kawai, Y., Hiramatsu, K., Kuwano, M. and Ogasawara, N. (2006) A new FtsZ-interacting protein, YlmF, complements the activity of FtsA during progression of cell division in *Bacillus subtilis*. *Mol Microbiol*, 60, 1364-1380.

Moriya, S., Kato, K., Yoshikawa, H. and Ogasawara, N. (1990) Isolation of a *dnaA* mutant of *Bacillus subtilis* defective in initiation of replication: amount of DnaA protein determines cells' initiation potential. *EMBO J*, 9, 2905-2910.

SUPPLEMENTARY INFORMATION

**Table S2:** Primers used in this study. Forward and reverse primers are indicated by 'F' and 'R', respectively.

| Name        | Information    | Sequence                                                |
|-------------|----------------|---------------------------------------------------------|
| Eg15        | A98V F         | CAGCATGACCAGGTGAAGCGGATTGTTG                            |
| Eg16        | A98V R         | CAACAATCCGCTTCACCTGGTCATGCTG                            |
| Eg23        | F124S F        | CGGCTCAGATATTTCCCTCTGCACGCCTGAC                         |
| Eg34        | F124S R        | GTCAGGCGTGCAGAGGGAAATATCTGAGCCG                         |
| Eg94        | RF pMal-SepF F | AACAACCTCGGGATCGAGGGAAGGATGAAAG<br>ATAAACTGAAAACTTTTTTC |
| Eg95        | RF pMal-SepF R | CAGTGCCAAGCTTGCCTGTCATTACCACCTCT<br>GATGTTTCGTCTTCAGAT  |
| sepF134F    | $\Delta$ 134 F | GTAGATGTATCATAAACAATTTCTGAG                             |
| sepF134R    | $\Delta$ 134 R | CTCAGAAATTGTTTATGATACATCTAC                             |
| sepFG135N-F | G135N F        | CGTAGATGTATCTAACACAATTTCTGAG                            |
| sepFG135N-R | G135N R        | CTCAGAAATTGTGTTAGATACATCTACG                            |
| LH224       | pMutin-sepF F  | AAAGAATTCTAAGAGACAGAGCGGGAATCTC                         |
| LH225       | pMutin-sepF R  | AAAGGATCCTTACCACCTCTGATGTTTCGT                          |

SUPPLEMENTARY INFORMATION

**Fig. S1.** (A) A Western blot of SepF and FtsZ, with titrations of purified SepF or FtsZ standards, and total protein from wild type cells (Wt). (B) Estimated cellular concentrations of SepF and FtsZ from different experiments (see Material and Methods for details). Cultures were grown at 30 °C or 37 °C. For calculations see Experimental Procedures.

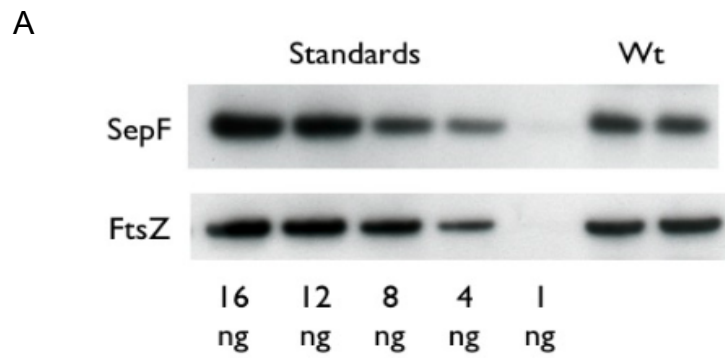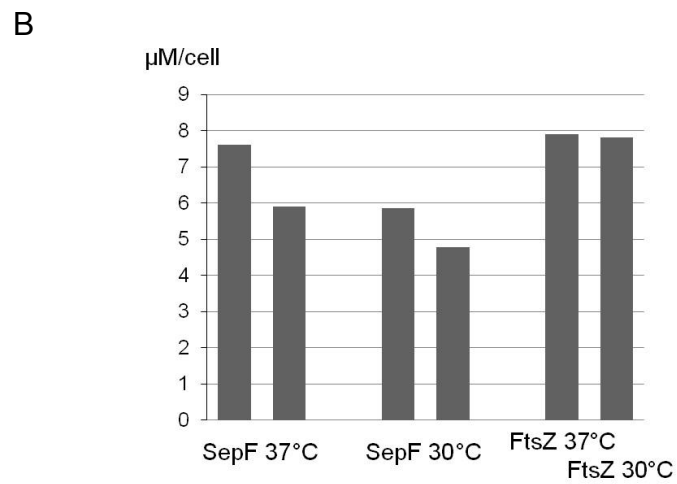

SUPPLEMENTARY INFORMATION

**Fig. S2.** SDS-PAA gel of one of the FtsZ pelleting assays. Samples were prepared in pH 6.5 polymerization buffer (50 mM MES pH 6.5, 50 mM KCl, 10 mM MgCl<sub>2</sub>), or in pH 7.4 buffer (50 mM Tris-HCl pH 7.4, 300 mM KCl, 10 mM MgCl<sub>2</sub>), using 10 μM FtsZ, 6 μM SepF and 1 mM GTP. FtsZ was incubated in the absence (-) or presence (+) of GTP and SepF (SepF). After incubation the samples were centrifuged and fractions of the supernatants (sup) and pellets (pel) were loaded onto a SDS-PAA gel. (B) SDS-PAA gel of pellet (pel) and supernatant (sup) fractions of 6 μM SepF in polymerization buffer pH 6.5 or pH 7.4 (without GTP).

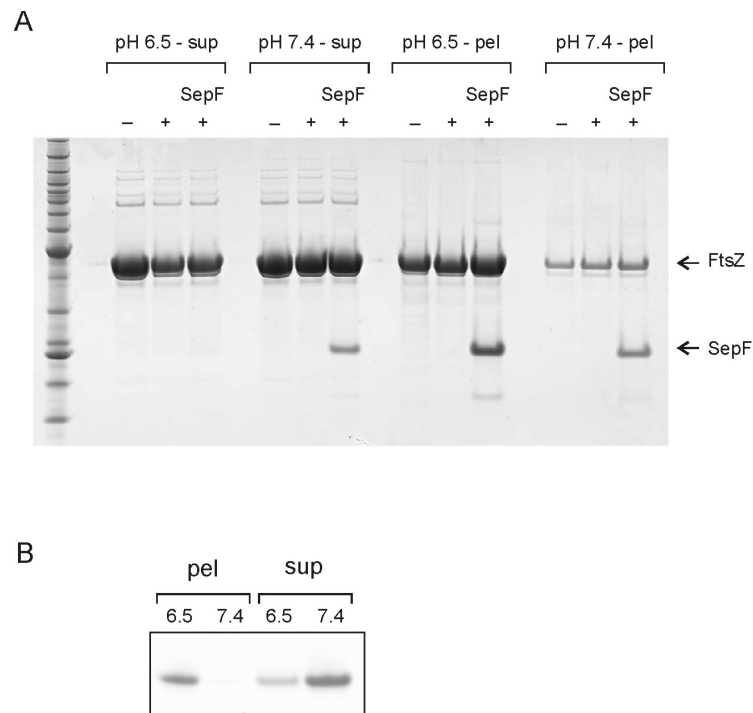

SUPPLEMENTARY INFORMATION

**Fig. S3.** Light scattering analyses of FtsZ polymerization under different buffer conditions, (A) 50 mM MES pH 6.5, 50 mM KCl, 10 mM MgCl<sub>2</sub>, (B) 50 mM MES pH 6.5, 300 mM KCl, 10 mM MgCl<sub>2</sub>, (C) 50 mM Tris pH 7.4, 50 mM KCl, 10 mM MgCl<sub>2</sub>, and (D) 50 mM Tris pH 7.4, 300 mM KCl, 10 mM MgCl<sub>2</sub>. All reactions contained 10 μM FtsZ, and were initiated by the addition of 2 mM GTP after 1 minute equilibration. A 350 nm wavelength and 2.5 nm slit-width was used for excitation and emission.

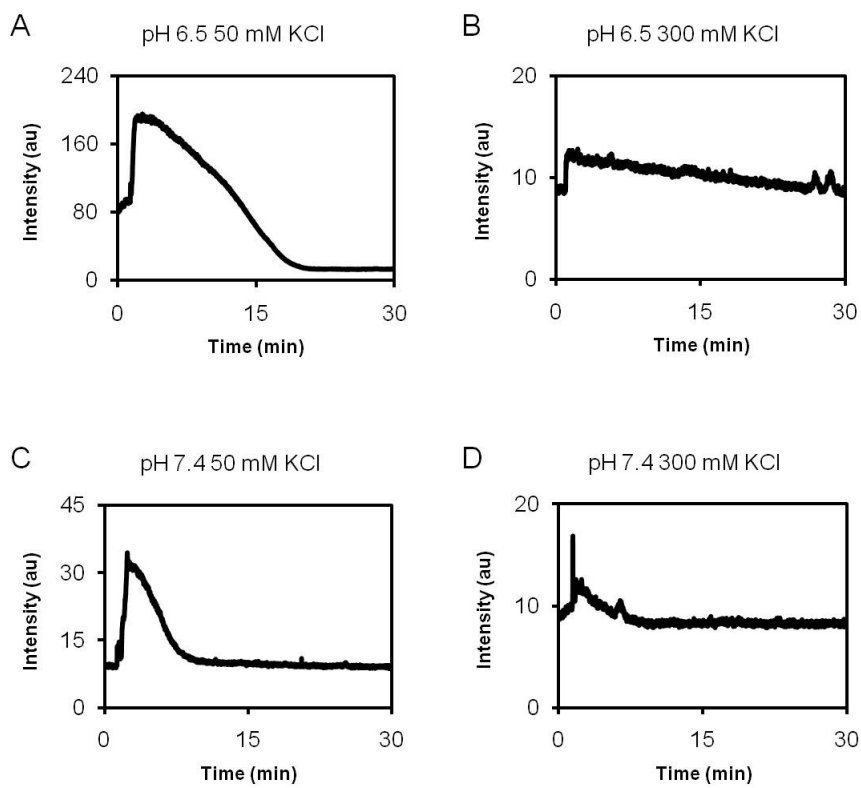

SUPPLEMENTARY INFORMATION

**Fig. S4.** Growth of FtsZ-SepF tubules. Compilation of different images taken over a 20 min time period. After 1 min no FtsZ-SepF tubules are observed, but SepF rings tend to cluster (central dark region). After 5 min, FtsZ-SepF tubules can be observed, which often seem to emerge from a cluster of SepF rings. After 20 min very long tubules (up to 5  $\mu\text{m}$ ) were observed. Scale bar for the 1, 5 and 10 min images is 100 nm, and for the 20 min images is 500 nm.

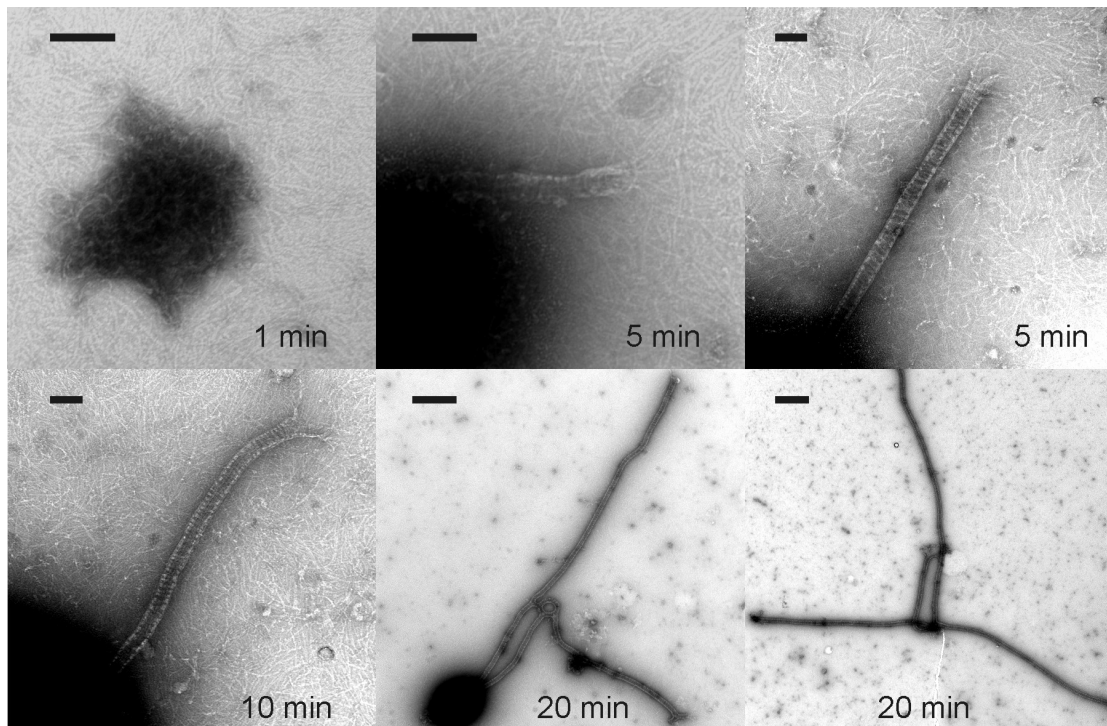

SUPPLEMENTARY INFORMATION

**Fig. S5.** EM images of negatively stained SepF mutants A98V (left) and F124S (right) mixed with FtsZ. Standard FtsZ polymerization conditions were used (50 mM Tris-HCl pH 7.4, 300 mM KCl, 10 mM MgCl<sub>2</sub>, 1 mM GTP), and concentrations of 10 μM, and 6 μM for FtsZ and SepF, respectively (scale bar: 100 nm). Mutant A98V makes almost no rings (see main text), and no rings could be discerned in the EM images. Mutant F124S makes normal rings, and some are indicated by a white arrow.

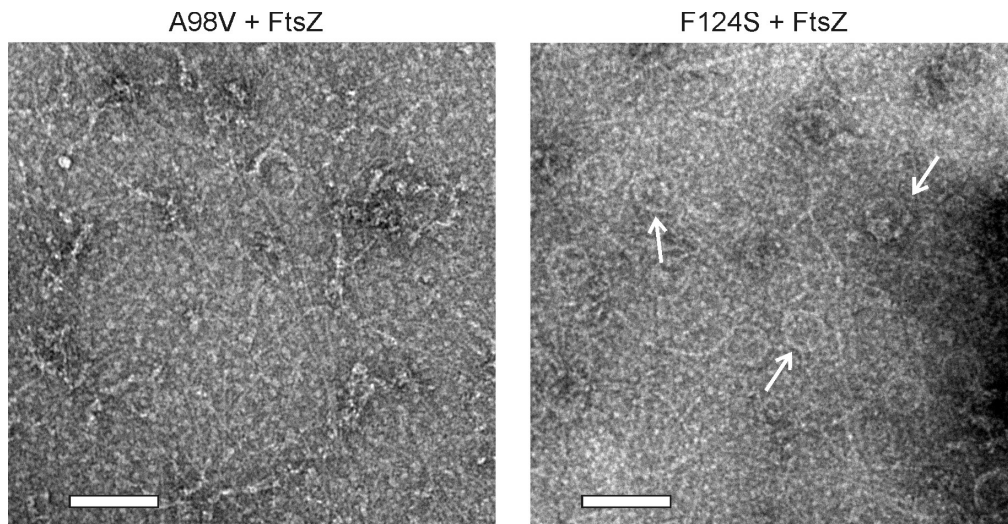



SUPPLEMENTARY INFORMATION

**Fig. S6.** Transmission electron micrographs of division septa in *B. subtilis* wild type (wt),  $\DeltaftsA$ , and  $\DeltasepF$  cells. For each strain two examples of negatively stained thin sections are shown. Scale bar represents 200 nm.

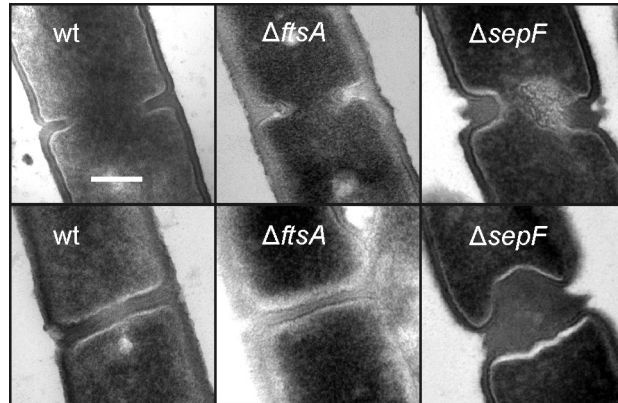

Supplement: emboj2010345s1.pdf [file emboj2010345s1.pdf]
